# Supplementary material for: Protein-based amide proton transfer-weighted MR imaging of amnestic mild cognitive impairment
Source: PubMed Central journal article supplement — Neuroimage Clin. 2019 Dec 27;25:102153. doi: 10.1016/j.nicl.2019.102153 (PMC6948365; doi:10.1016/j.nicl.2019.102153), 2019-12-27
Supplement: mmc1.pdf [file mmc1.pdf]

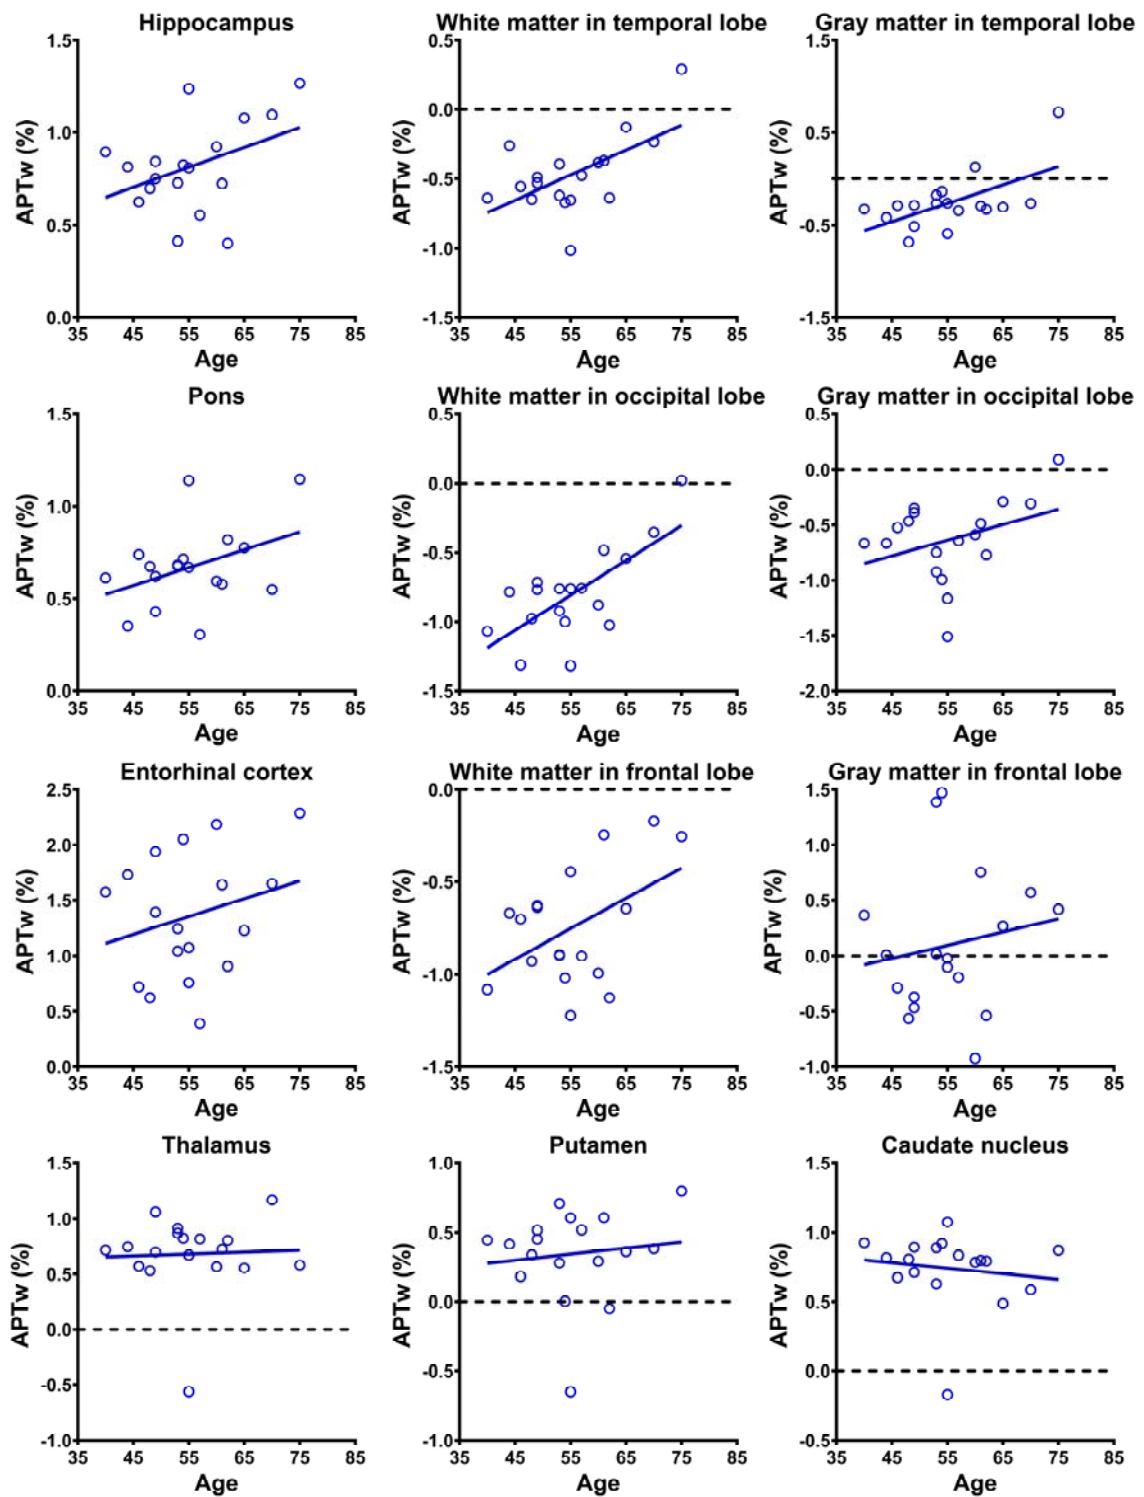

**Fig. S1.** The correlation analysis of the APTw signal with age in the 12 regions of interest (ROIs) in the normal (blue) group.

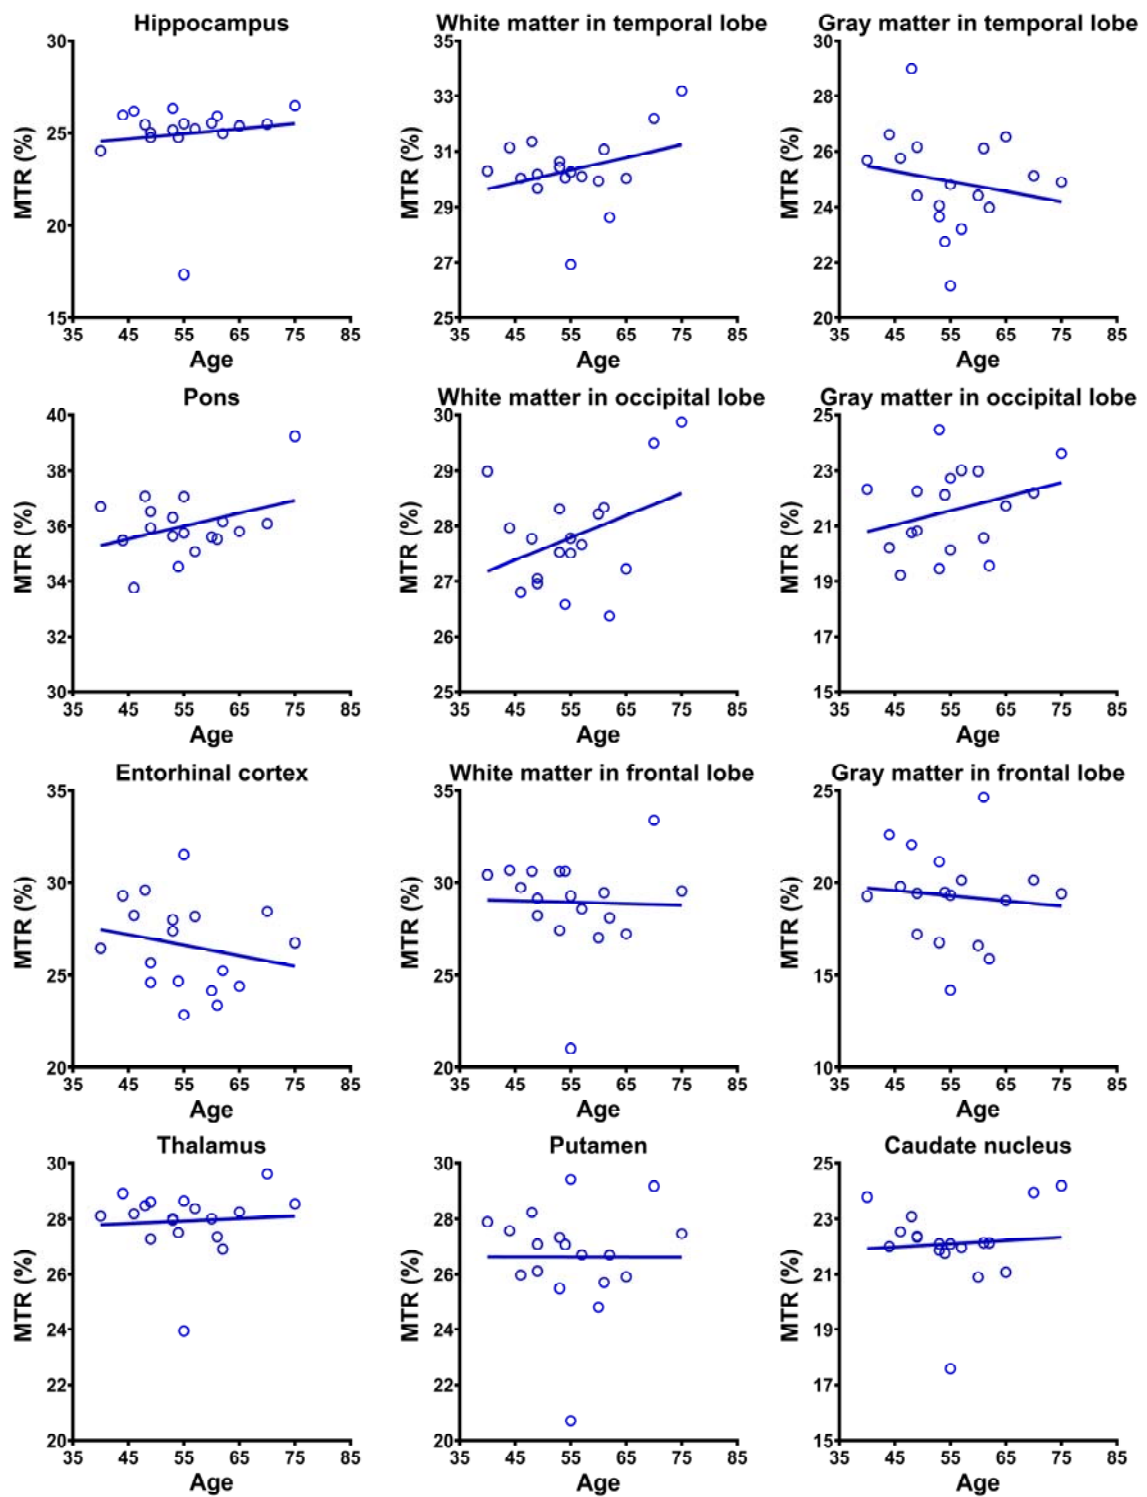

**Fig. S2.** The correlation analysis of the MTR signal with age in the 12 regions of interest (ROIs) in the normal (blue) group.

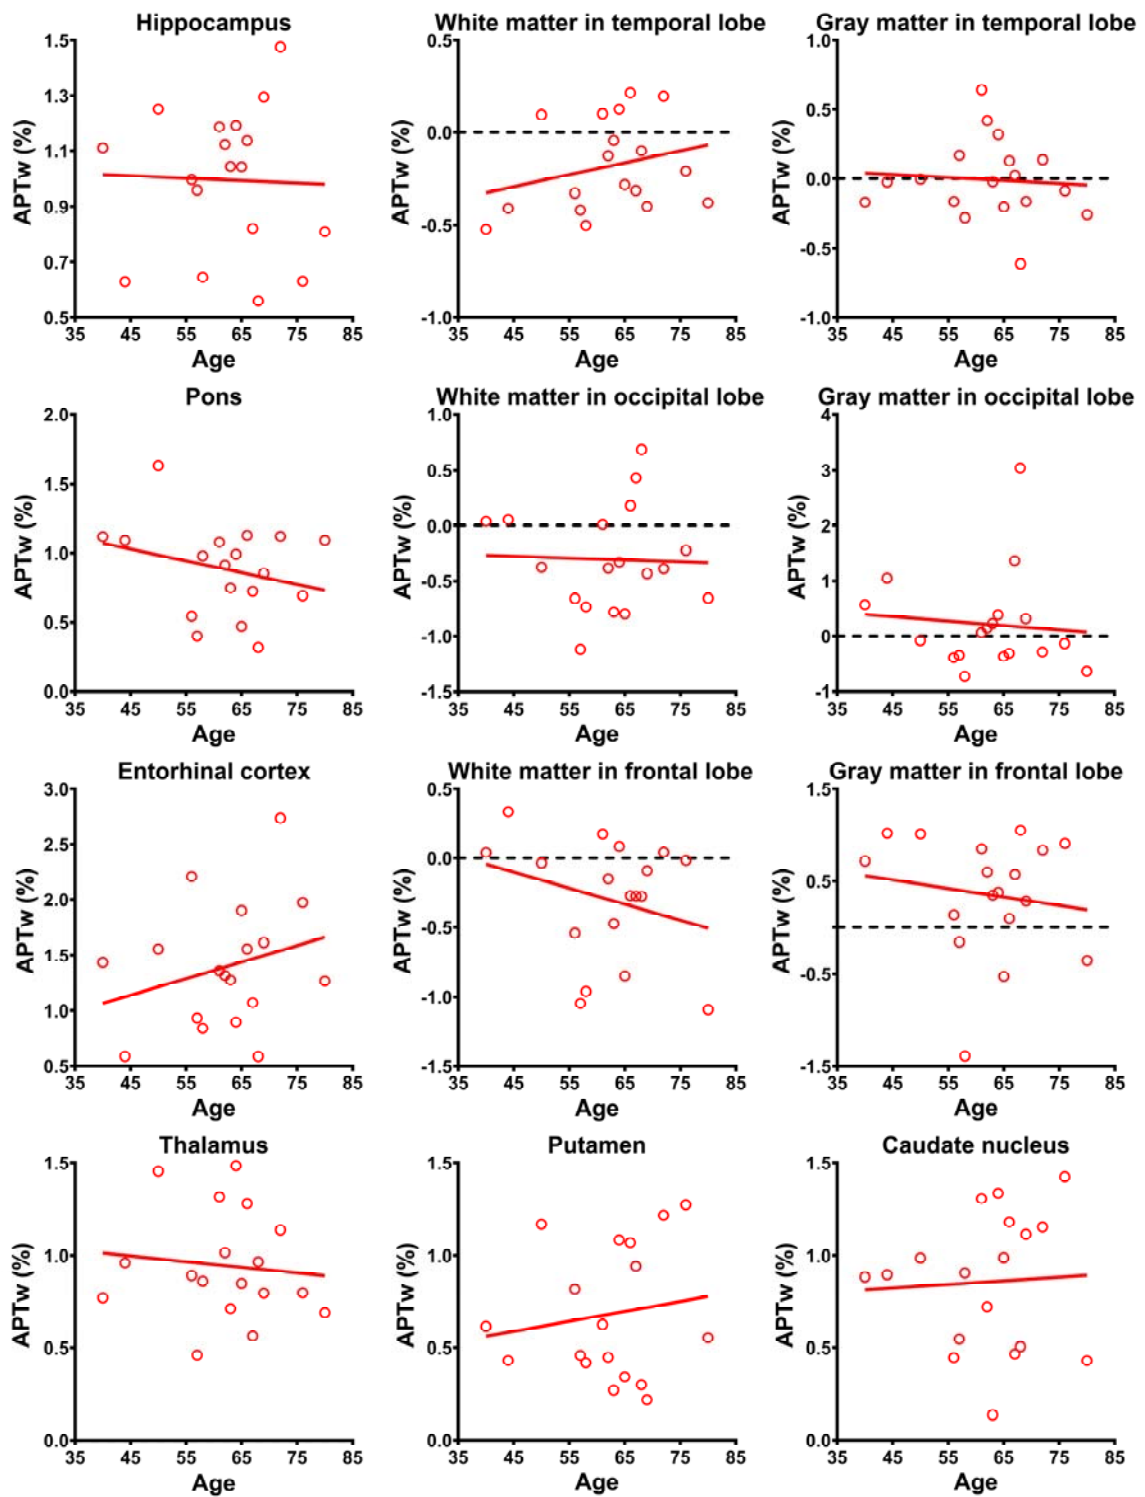

**Fig. S3.** The correlation analysis of the APTw signal with age in the 12 regions of interest (ROIs) in the aMCI (red) group.

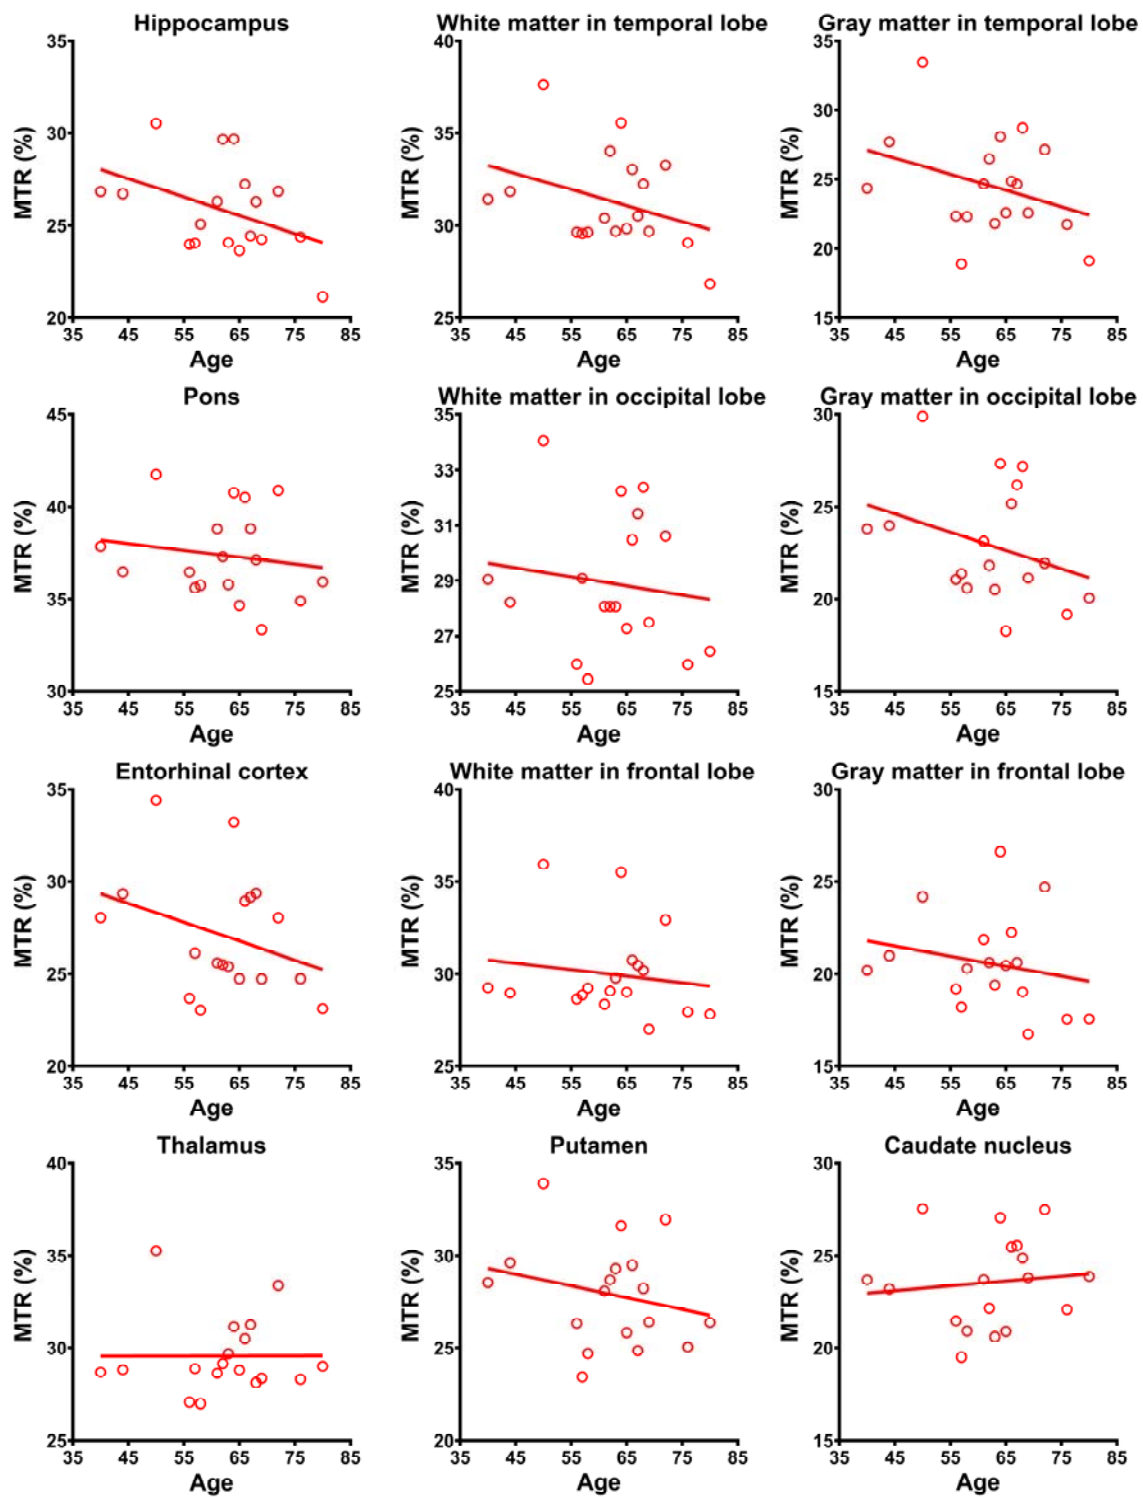

**Fig. S4.** The correlation analysis of the MTR signal with age in the 12 regions of interest (ROIs) in the aMCI (red) group.
